# Supplementary material for: Highly stable and covalently functionalized magnetic nanoparticles by polyethyleneimine for Cr(vi) adsorption in aqueous solution
Source: Royal Society of Chemistry journal article supplement (doi:10.1039/c4ra10602d), 2014-11-26
Supplement: c4ra10602d1.pdf [file c4ra10602d1.pdf]

Electronic Supplementary Information

**Highly stable and covalently functionalized magnetic nanoparticles  
by polyethyleneimine for Cr (VI) adsorption from aqueous solution**

**Bo Chen, Xuesong Zhao, Yang Liu, Bugang Xu and Xuejun Pan\***

*Faculty of Environmental Science and Engineering, Kunming University of Science  
and Technology, Kunming, Yunnan 650500, PR China.*

*E-mail: xjpan@kmust.edu.cn.*

Table S1. Effect of different concentrations of NaOH on Cr (VI) adsorption capacity

| Concentration of NaOH<br>(mol L <sup>-1</sup> ) | Untreated | 0.1    | 0.2    | 0.3    | 0.5    |
|-------------------------------------------------|-----------|--------|--------|--------|--------|
| Adsorption capacity<br>(mg g <sup>-1</sup> )    | 124.44    | 124.37 | 124.50 | 124.26 | 124.38 |

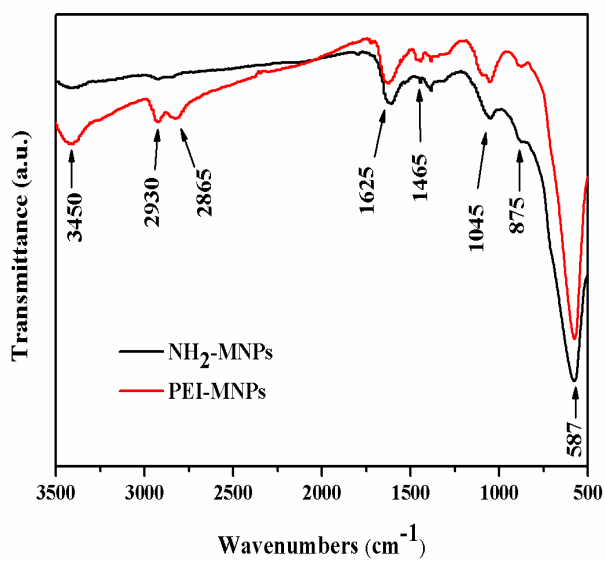

Fig. S1 FT-IR spectra of NH<sub>2</sub>-MNPs and PEI-MNPs.

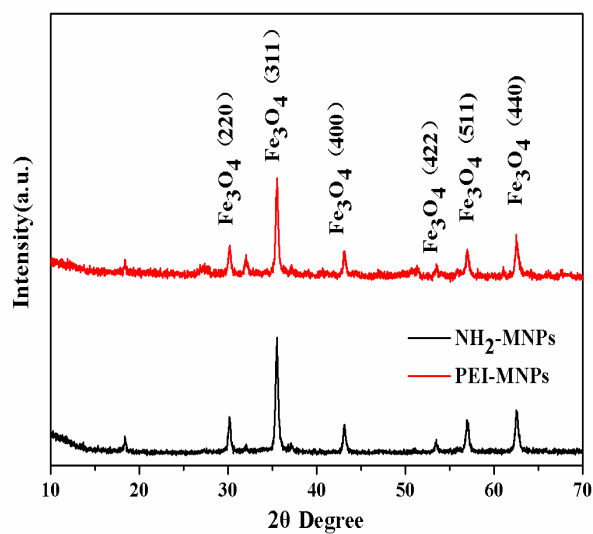

Fig. S2 XRD patterns of NH<sub>2</sub>-MNPs and PEI-MNPs.

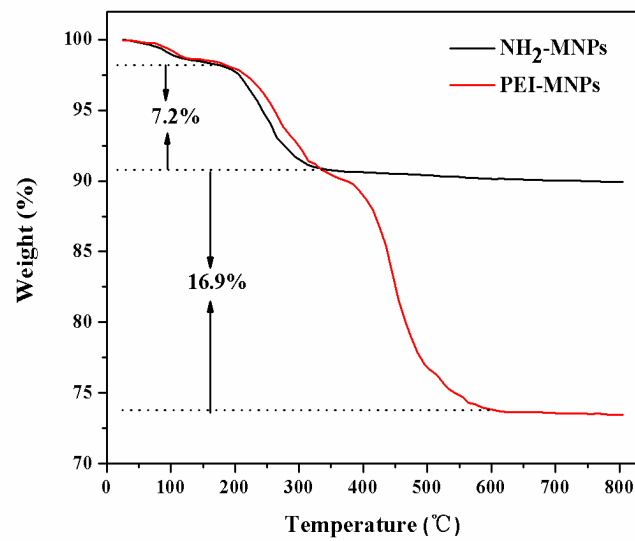

Fig. S3 TGA curves of NH<sub>2</sub>-MNPs and PEI-MNPs.

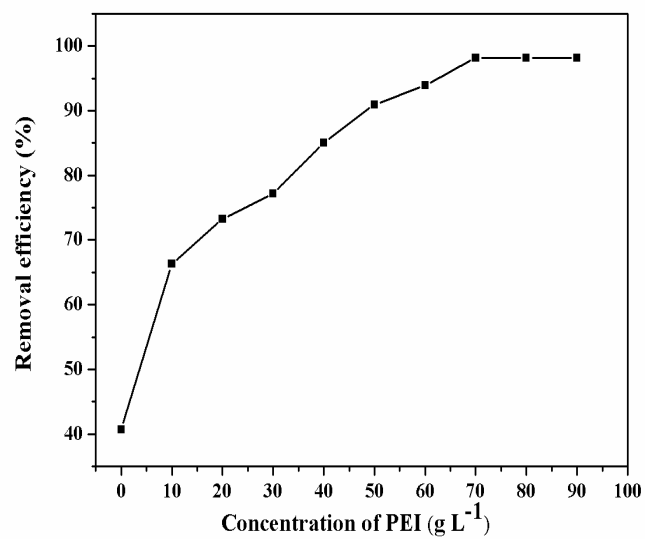

Fig. S4 Effect of concentration of PEI on Cr (VI) adsorption on PEI-MNPs.
